# Supplementary material for: Photodeposition of Fe-Based Cocatalysts Capable of Effectively Promoting the Oxygen Evolution Activity of BaTaO2N
Source: MDPI journal article supplement (doi:10.3390/catal13020373), 2023-02-08
Supplement: s1 [file s1]

## Supporting Information

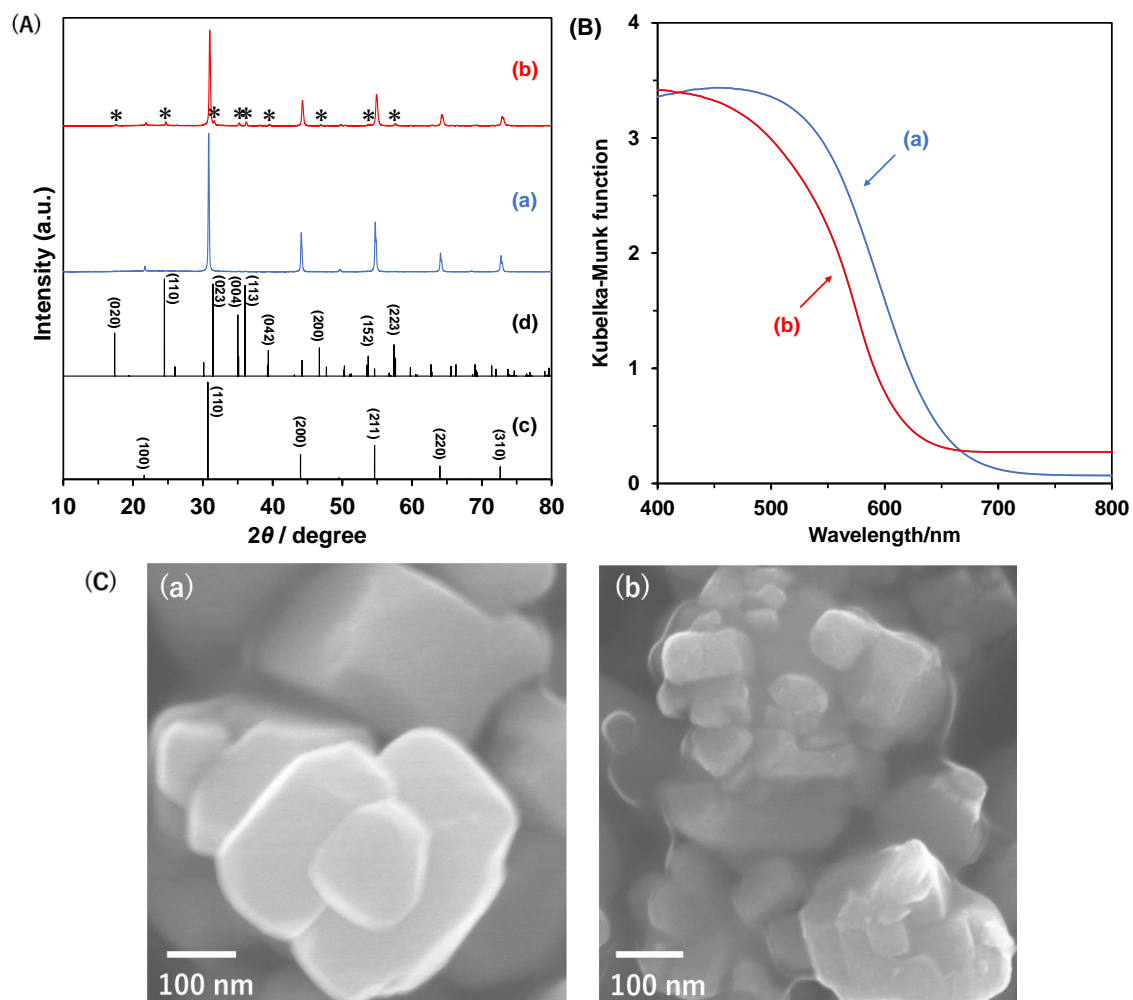

**Figure S1.** (A) XRD patterns, (B) DRS data, and (C) SEM images obtained for (a)  $\text{BaTaO}_2\text{N}$  and (b)  $\text{BaTaO}_2\text{N:Mg}$ . The XRD pattern labeled (c) in panel (A) is that for cubic  $\text{BaTaO}_2\text{N}$  (ICDD PDF 01-084-1748) [22], which is included as a reference, and the asterisk (\*) symbols indicate peaks related to  $\text{Ta}_3\text{N}_5$  (ICDD PDF 01-079-1533) [23].

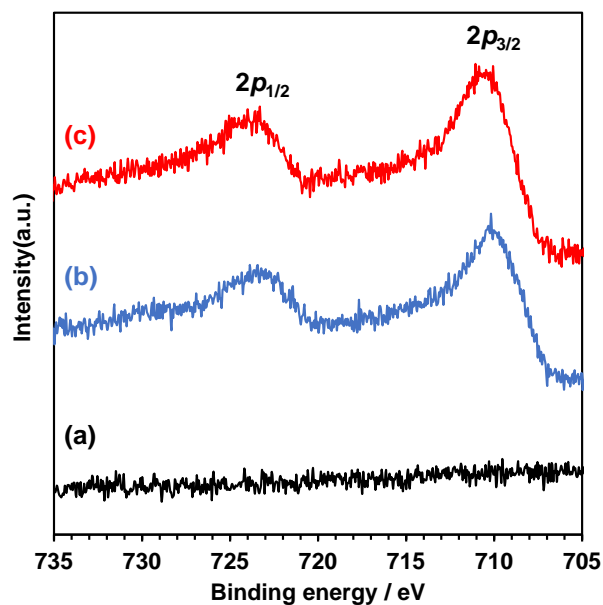

**Figure S2.** Fe 2*p* XPS spectra of BaTaO<sub>2</sub>N:Mg loaded with (a) no cocatalyst, (b) FeO<sub>x</sub> by photodeposition, and (c) Pt by impregnation-hydrogen reduction with subsequent photodeposition of FeO<sub>x</sub>. Fe and Pt were both loaded at 0.5 wt% to provide sufficient analytical sensitivity.
